# Supplementary material for: Pressure-Enhanced Photocurrent in One-Dimensional SbSI via Lone-Pair Electron Reconfiguration
Source: MDPI journal article supplement (doi:10.3390/ma15113845), 2022-05-27
Supplement: s1 [file s1]

## **Supporting Information**

### **Pressure-Enhanced Photocurrent in One-dimensional SbSI via Lone-Pair Electrons Reconfiguration**

Tianbiao Liu,<sup>1</sup> Kejun Bu,<sup>1\*</sup> Qian Zhang,<sup>1, 2</sup> Peijie Zhang,<sup>1</sup> Songhao Guo,<sup>1</sup> Jiayuan Liang,<sup>1</sup> Bihan Wang,<sup>1</sup> Haiyan Zheng,<sup>1</sup> Yonggang Wang,<sup>1</sup> Wenge Yang,<sup>1</sup> and Xujie Lü<sup>1\*</sup>

<sup>1</sup> Center for High Pressure Science and Technology Advanced Research, Shanghai 201203, P. R. China

<sup>2</sup> College of Material and Chemical Engineering, Zhongyuan University of Technology, Zhengzhou 450007, P. R. China

## Figures and tables

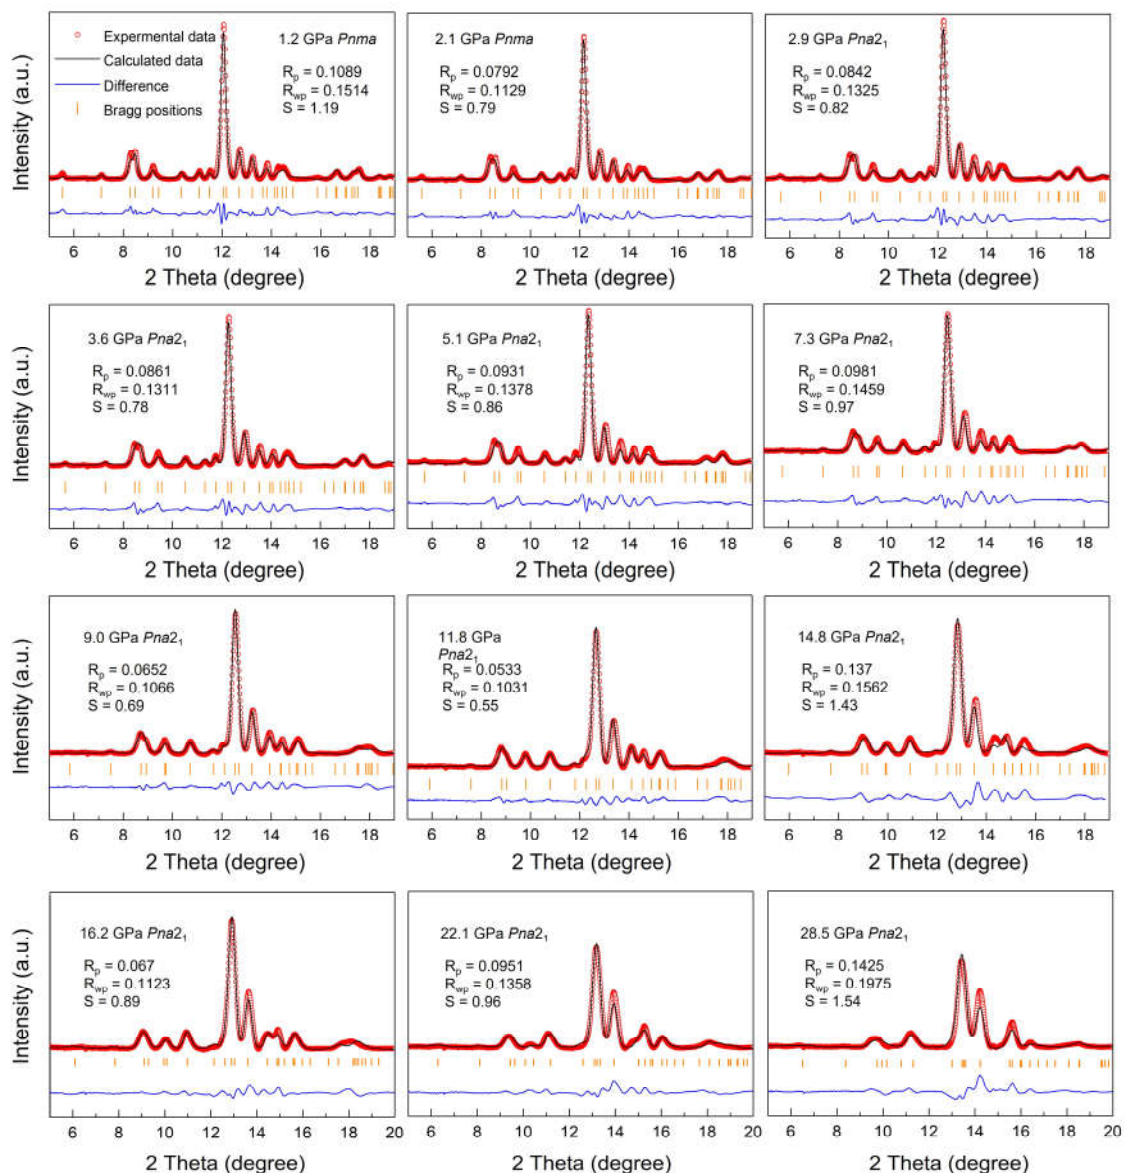

**Figure S1.** Rietveld refinement results of SbSI at selected pressures.

**Table S1.** The lattice parameters of the SbSI at selected pressures.

| Pressure (GPa) | Space group             | <i>a</i> (Å) | <i>b</i> (Å) | <i>c</i> (Å) | <i>V</i> (Å <sup>3</sup> ) |
|----------------|-------------------------|--------------|--------------|--------------|----------------------------|
| 1.2            | <i>Pnma</i>             | 8.3869       | 9.9900       | 4.0707       | 341.064                    |
| 2.1            | <i>Pnma</i>             | 8.3036       | 9.8979       | 4.0409       | 332.112                    |
| 2.9            | <i>Pna2<sub>1</sub></i> | 8.2484       | 9.8287       | 4.0298       | 326.702                    |
| 3.6            | <i>Pna2<sub>1</sub></i> | 8.2094       | 9.7728       | 4.0216       | 322.648                    |
| 5.1            | <i>Pna2<sub>1</sub></i> | 8.1399       | 9.6954       | 4.0040       | 315.994                    |

|      |          |         |        |        |         |
|------|----------|---------|--------|--------|---------|
| 7.3  | $Pna2_1$ | 8.0485  | 9.5781 | 3.9802 | 306.831 |
| 9.0  | $Pna2_1$ | 7.9601  | 9.5120 | 3.9547 | 299.435 |
| 11.8 | $Pna2_1$ | 7.8664  | 9.3614 | 3.9326 | 289.598 |
| 13.2 | $Pna2_1$ | 7.8303  | 9.3421 | 3.9170 | 286.534 |
| 14.8 | $Pna2_1$ | 7.73860 | 9.2300 | 3.8756 | 276.828 |
| 16.2 | $Pna2_1$ | 7.68650 | 9.1520 | 3.8598 | 271.524 |
| 18.8 | $Pna2_1$ | 7.5750  | 8.9960 | 3.8520 | 262.494 |
| 22.1 | $Pna2_1$ | 7.4870  | 8.8990 | 3.8078 | 253.701 |
| 24.2 | $Pna2_1$ | 7.4390  | 8.7990 | 3.769  | 246.702 |

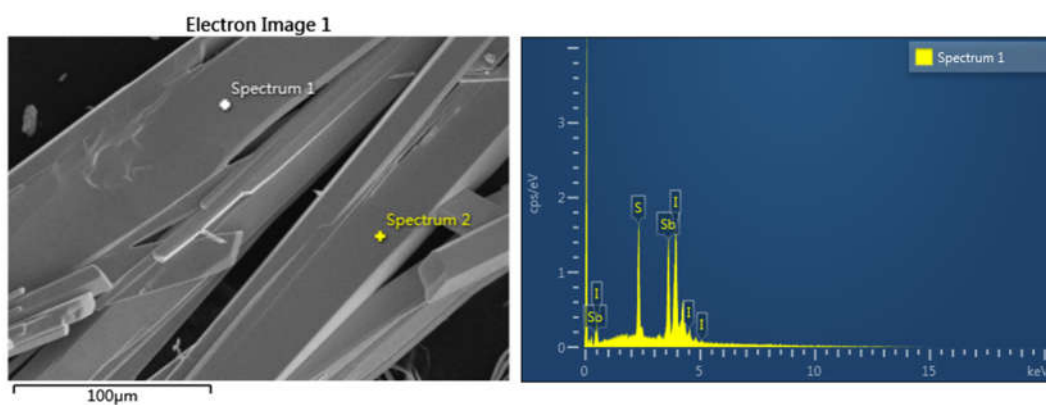

**Figure S2.** The scanning electron microscope (SEM) image and X-ray energy dispersive spectroscopy (EDS) of SbSI single crystal.

**Table S2.** Energy-dispersive X-ray analysis results of SbSI.

| Element | Wt%    | Atomic % |
|---------|--------|----------|
| S       | 10.77  | 31.85    |
| Sb      | 45.74  | 35.64    |
| I       | 43.50  | 32.51    |
| Total:  | 100.00 | 100.00   |

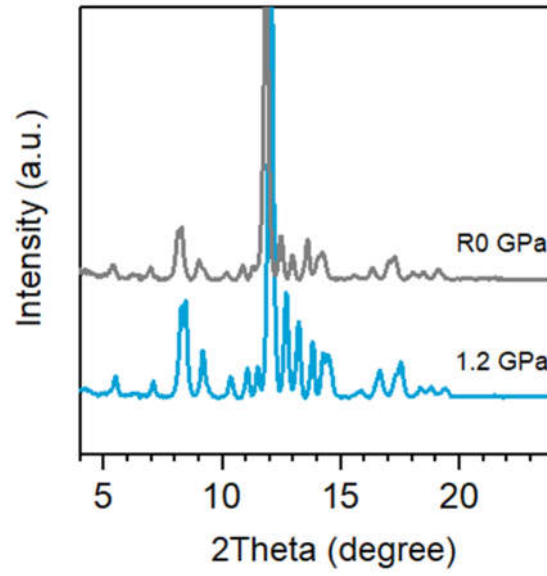

**Figure S3.** XRD patterns of the SbSI initial sample and the recovered sample.

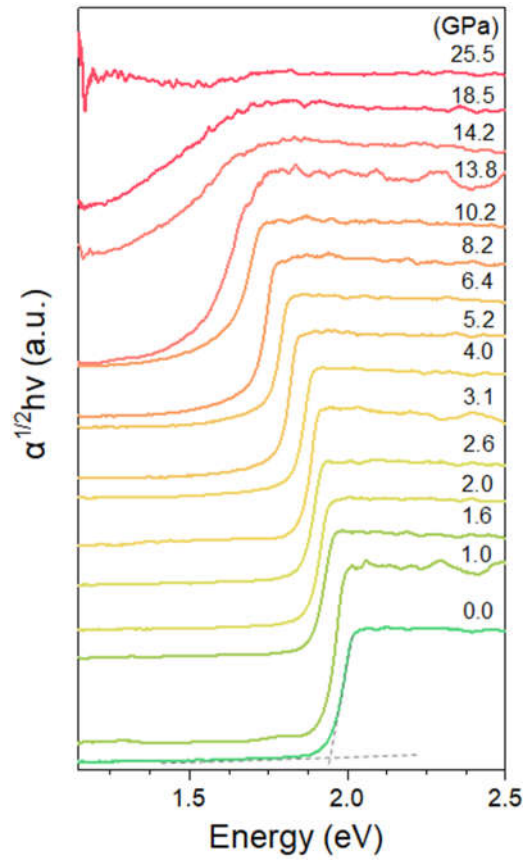

**Figure S4.** Selective the plot of  $\alpha^{1/2}hv$  versus bandgap on a single-crystal SbSI under compression.

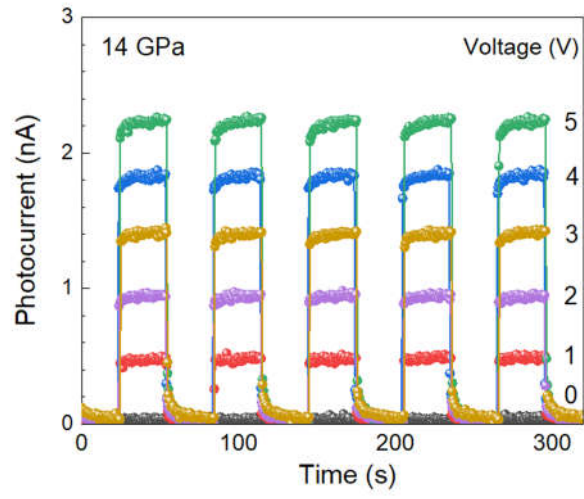

**Figure S5.** Photocurrent of 14 GPa at different bias voltages.

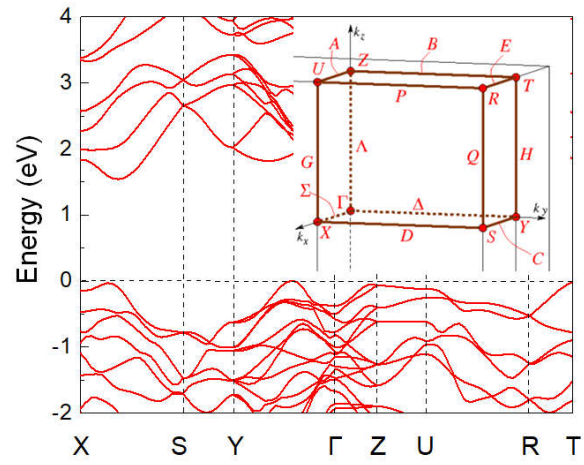

**Figure S6.** Electronic band structure of SbSI.
